# Supplementary material
Source: publisher figshare collection journal article supplement (https://acs.figshare.com/ndownloader/files/8523277)
Supplement: Supplementary file 1 [file 8523277]

# Supporting Information

## **Multifunctional and Redox-responsive Self-assembled Magnetic Nanovectors for Protein Delivery and Dual-Modal Imaging**

Hong Yu Yang <sup>§</sup>, Moon-Sun Jang <sup>#</sup>, Yi Li <sup>§</sup>, Jung Hee Lee <sup>#,\*</sup>, and Doo Sung Lee <sup>§,\*</sup>

<sup>§</sup>Theranostic Macromolecules Research Center, School of Chemical Engineering,  
Sungkyunkwan University, Suwon 440-746, Republic of Korea.

<sup>#</sup>Department of Radiology, Samsung Medical Center, Sungkyunkwan University  
School of Medicine and Center for Molecular and Cellular Imaging, Samsung  
Biomedical Research Institute, Seoul 135-710, Republic of Korea.

Jung Hee Lee **E-mail:** [hijunghee@skku.edu](mailto:hijunghee@skku.edu)  
Doo Sung Lee **E-mail:** [dslee@skku.edu](mailto:dslee@skku.edu)

### **Synthesis of superparamagnetic iron oxide nanoparticles (SPIONs)**

SPIONs-capped oleic acid (OA) with an average diameter of  $\sim 4$  nm were firstly synthesized using the previously Sun et al.'s reported procedure with slight modification. Briefly, 0.7 g of  $\text{Fe}(\text{acac})_3$  (2 mmol), 1.7 g of oleic acid (6 mmol), 1.6 g of oleylamine (6 mmol) and 2.58 g of 1,2-hexadecanediol (10 mmol) were dissolved in 20 mL of phenyl ether. The mixture was rapidly heated to 260 °C at a constant heating rate of 20 °C  $\text{min}^{-1}$  and then kept at this for 40 min under a nitrogen flow. After the reaction, the mixture containing SPIONs was cooled room temperature and treated by adding 20 mL of ethanol to precipitate the SPIONs. The crude SPIONs were purified by centrifuging at 12000 rpm for 15 min to remove undispersed residue and solvent, and redispersed in chloroform at a concentration of 10 mg  $\text{mL}^{-1}$ .

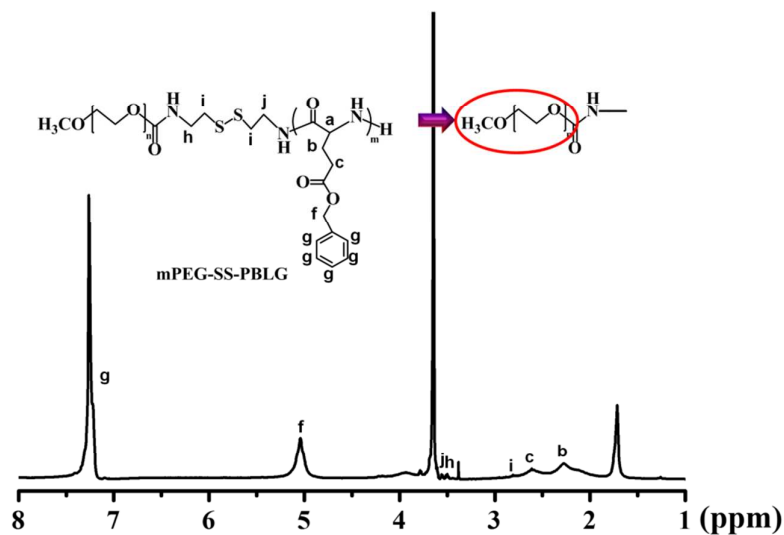

**Figure S1.**  $^1\text{H}$  NMR spectra collected from mPEG-SS-PBLG polymer ligand backbone in  $\text{CDCl}_3$ .

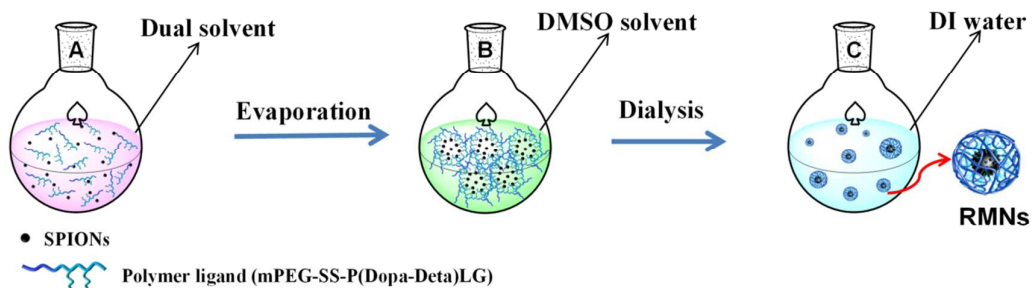

**Figure S2.** Schematic illustration of self-assembly process of SPIONs and mPEG-SS-P(Dopa-Deta)LG polymer ligand. (A). mPEG-SS-P(Dopa-Deta)LG polymer ligand and SPIONs are initially dispersed in mixture solvent of chloroform and DMSO. (B). Chloroform is gradually removed by evaporation at  $40^\circ\text{C}$ . (C). Induce the self-assembly colloidal of SPIONs and mPEG-SS-P(Dopa-Deta)LG by dialysis method using DI water (pH 7.0).

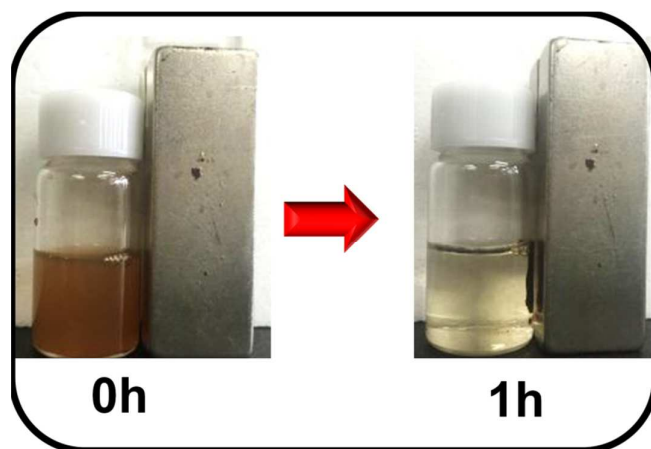

**Figure S3.** photographs of the RMNs dispersed in aqueous solution with applied magnetic field at 0 h and 1h.

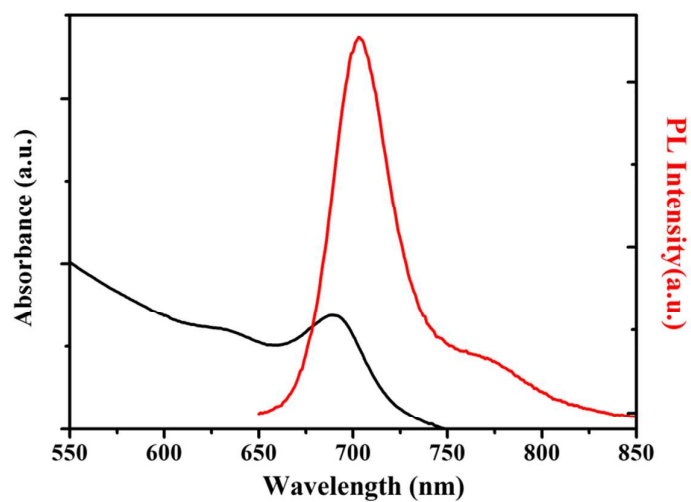

**Figure S4.** UV-vis absorption and fluorescence spectrum of the RMNs-HSA-Cy5.5.
